# Supplementary material for: Decreasing rates of major lower-extremity amputation in people with diabetes but not in those without: a nationwide study in Belgium
Source: Springer Nature journal article supplement (doi:10.1007/s00125-018-4655-6), 2018-06-16
Supplement: MOESM1 [file 15851052]

**ESM Table 1: Major amputation rate, Belgium, 2009-2013 standardised to the European Standard Population 2013**

|                   | Ard <sup>a</sup> | Arn <sup>a</sup> | RR <sup>b</sup> |
|-------------------|------------------|------------------|-----------------|
| total population  |                  |                  |                 |
| calendar year:    |                  |                  |                 |
| 2009              | 44.3             | 6.4              | 7               |
| 2010              | 45.4             | 6.3              | 7.2             |
| 2011              | 39.1             | 6.7              | 5.8             |
| 2012              | 35.9             | 6.3              | 5.7             |
| 2013              | 31.6             | 6.3              | 5               |
| male population   |                  |                  |                 |
| calendar year:    |                  |                  |                 |
| 2009              | 60.4             | 8.9              | 6.8             |
| 2010              | 61.9             | 8.6              | 7.2             |
| 2011              | 58.7             | 9.3              | 6.3             |
| 2012              | 53.6             | 8.8              | 6.1             |
| 2013              | 45.2             | 9                | 5               |
| female population |                  |                  |                 |
| calendar year:    |                  |                  |                 |
| 2009              | 28.2             | 3.9              | 7.3             |
| 2010              | 28.8             | 4                | 7.2             |
| 2011              | 19.5             | 4.1              | 4.8             |
| 2012              | 18.3             | 3.7              | 4.9             |
| 2013              | 18.1             | 3.6              | 5               |

<sup>a</sup> Amputation rate per 100 000 person years in the population with diabetes (ARd) and without diabetes (ARn), standardized to the Belgian population 2011

<sup>b</sup> Relative risk comparing amputation rate in the population with and without diabetes (ARd/ARn)

**ESM Table 2: Baseline characteristics of any amputations, Belgium, 2009-2013**

| Diabetes                          |                               |                            |                  | No diabetes                       |                   |                            |                  | RR <sup>c</sup> |     |
|-----------------------------------|-------------------------------|----------------------------|------------------|-----------------------------------|-------------------|----------------------------|------------------|-----------------|-----|
| number of persons with amputation | mean age <sup>a</sup> (years) | number of total population | ARd <sup>b</sup> | number of persons with amputation | mean age* (years) | number of total population | ARn <sup>b</sup> |                 |     |
| <b>All amputations</b>            |                               |                            |                  |                                   |                   |                            |                  |                 |     |
| total population                  |                               |                            |                  |                                   |                   |                            |                  |                 |     |
| calendar year:                    |                               |                            |                  |                                   |                   |                            |                  |                 |     |
| 2009                              | 1691                          | 71.0                       | 678655           | 122.2                             | 1278              | 68.9                       | 10198663         | 14.1            | 8.6 |
| 2010                              | 1710                          | 71.1                       | 738256           | 119.1                             | 1229              | 68.8                       | 10226043         | 13.5            | 8.8 |
| 2011                              | 1674                          | 70.5                       | 793883           | 112.4                             | 1253              | 68.0                       | 10255320         | 13.8            | 8.2 |
| 2012                              | 1735                          | 70.9                       | 846796           | 103.7                             | 1181              | 68.2                       | 10271802         | 13.0            | 8.0 |
| 2013                              | 1774                          | 71.0                       | 896126           | 100.4                             | 1193              | 68.2                       | 10269852         | 13.0            | 7.7 |
| male population                   |                               |                            |                  |                                   |                   |                            |                  |                 |     |
| calendar year:                    |                               |                            |                  |                                   |                   |                            |                  |                 |     |
| 2009                              | 1148                          | 69.3                       | 326803           | 181.3                             | 736               | 66.0                       | 5021923          | 18.6            | 9.8 |
| 2010                              | 1121                          | 69.5                       | 354104           | 173.0                             | 697               | 65.7                       | 5038345          | 17.6            | 9.9 |
| 2011                              | 1158                          | 69.0                       | 379168           | 172.7                             | 716               | 66.0                       | 5056551          | 18.1            | 9.6 |
| 2012                              | 1191                          | 69.6                       | 402725           | 157.4                             | 677               | 66.1                       | 5067837          | 17.1            | 9.2 |
| 2013                              | 1230                          | 69.8                       | 424291           | 152.0                             | 683               | 66.0                       | 5068800          | 17.0            | 8.9 |
| female population                 |                               |                            |                  |                                   |                   |                            |                  |                 |     |
| calendar year:                    |                               |                            |                  |                                   |                   |                            |                  |                 |     |
| 2009                              | 543                           | 74.7                       | 351852           | 69.0                              | 542               | 72.8                       | 5176740          | 10.4            | 6.7 |
| 2010                              | 589                           | 74.3                       | 384152           | 70.4                              | 532               | 72.9                       | 5187698          | 10.2            | 6.9 |
| 2011                              | 516                           | 73.8                       | 414715           | 57.5                              | 537               | 70.6                       | 5198769          | 10.3            | 5.6 |
| 2012                              | 544                           | 73.8                       | 444071           | 55.8                              | 504               | 71.1                       | 5203965          | 9.7             | 5.8 |
| 2013                              | 544                           | 73.8                       | 471835           | 54.8                              | 510               | 71.1                       | 5201052          | 9.8             | 5.6 |

<sup>a</sup>Age at time of first major amputation

<sup>b</sup> Amputation rate per 100 000 person years in the population with diabetes (ARd) and without diabetes (ARn), standardized to the Belgian population 2011

<sup>c</sup> Relative risk comparing amputation rate in the population with and without diabetes ( $AR_d/AR_n$ )

<sup>d</sup> Estimated proportion of amputations attributable to diabetes among persons with diabetes

<sup>e</sup> Estimated proportion amputation risk attributable to diabetes among the entire population

**ESM Table 3: Results of Poisson models: relative risks for any amputation, Belgium 2009-2013**

| Variables                                               | Relative risk (95% CI) <sup>b</sup> |                         |                         |
|---------------------------------------------------------|-------------------------------------|-------------------------|-------------------------|
|                                                         | Total population                    | Men                     | Women                   |
| <b>Model 1a (diabetes)</b>                              |                                     |                         |                         |
| Calendar year                                           | 0.946 (0.938,0.954)*                | 0.953 (0.944,0.962)*    | 0.932 (0.919,0.945)*    |
| Male vs. female                                         | 2.383 (2.322,2.445)*                | -----                   | -----                   |
| Age (years) <sup>a</sup>                                |                                     |                         |                         |
| ≥ 80                                                    | 14.031 (12.216,16.116)*             | 8.678 (7.456,10.100)*   | 31.270 (24.331,40.188)* |
| 70-79                                                   | 10.817 (9.420,12.422)*              | 7.073 (6.083,8.224)*    | 22.795 (17.729,29.308)* |
| 60-69                                                   | 8.303 (7.228,9.538)*                | 5.746 (4.942,6.681)*    | 14.869 (11.546,19.147)* |
| 50-59                                                   | 6.070 (5.274,6.986)*                | 4.218 (3.620,4.914)*    | 10.72 (8.292,13.860)*   |
| 40-49                                                   | 3.261 (2.801,3.797)*                | 2.152 (1.820,2.543)*    | 6.758 (5.154,8.861)*    |
| <b>Model 1b (no diabetes)</b>                           |                                     |                         |                         |
| Calendar year                                           | 0.980 (0.967,0.994)*                | 0.979 (0.963,0.996)*    | 0.982 (0.963,1.001)     |
| Male vs. female                                         | 1.766 (1.698,1.836)*                | -----                   | -----                   |
| Age (years) <sup>a</sup>                                |                                     |                         |                         |
| ≥ 80                                                    | 47.432 (43.996,51.138)*             | 45.13 (41.005,49.67)*   | 46.387 (41.662,51.647)* |
| 70-79                                                   | 23.695 (21.913,25.621)*             | 26.287 (23.871,28.947)* | 20.056 (17.874,22.505)* |
| 60-69                                                   | 11.348 (10.456,12.316)*             | 14.016 (12.701,15.467)* | 7.710 (6.788,8.758)*    |
| 50-59                                                   | 5.940 (5.447,6.478)*                | 6.769 (6.097,7.516)*    | 4.734 (4.145,5.408)*    |
| 40-49                                                   | 2.374 (2.137,2.638)*                | 2.745 (2.423,3.109)*    | 1.823 (1.54,2.158)*     |
| <b>Model 2 (both diabetes and no diabetes combined)</b> |                                     |                         |                         |
| Calendar year                                           | 0.980 (0.964,0.996)*                | 0.979 (0.959,0.999)*    | 0.982 (0.960,1.004)     |
| Diabetes (yes vs. no)                                   | 7.682 (7.283,8.104)*                | 8.997 (8.426,9.609)*    | 5.894 (5.461,6.362)*    |
| Male vs. female                                         | 2.096 (2.033,2.165)*                | -----                   | -----                   |
| Age (years) <sup>a</sup>                                |                                     |                         |                         |
| ≥ 80                                                    | 32.278 (29.709,35.126)*             | 28.236 (25.472,31.370)* | 36.248 (32.310,40.805)* |
| 70-79                                                   | 20.687 (19.035,22.517)*             | 20.111 (18.166,22.317)* | 20.682 (18.384,23.342)* |
| 60-69                                                   | 13.505 (12.419,14.708)*             | 14.372 (12.985,15.945)* | 10.616 (9.390,12.037)*  |
| 50-59                                                   | 8.015 (7.345,8.758)*                | 8.603 (7.747,9.574)*    | 6.421 (5.638,7.328)*    |
| 40-49                                                   | 3.105 (2.793,3.453)*                | 3.312 (2.919,3.759)*    | 2.692 (2.295,3.155)*    |
| Diabetes x calendar year                                | 0.965 (0.944,0.985)*                | 0.972 (0.947,0.998)*    | 0.949 (0.920,0.979)*    |

<sup>a</sup> Reference category: 18-49 years

\* p<0.05

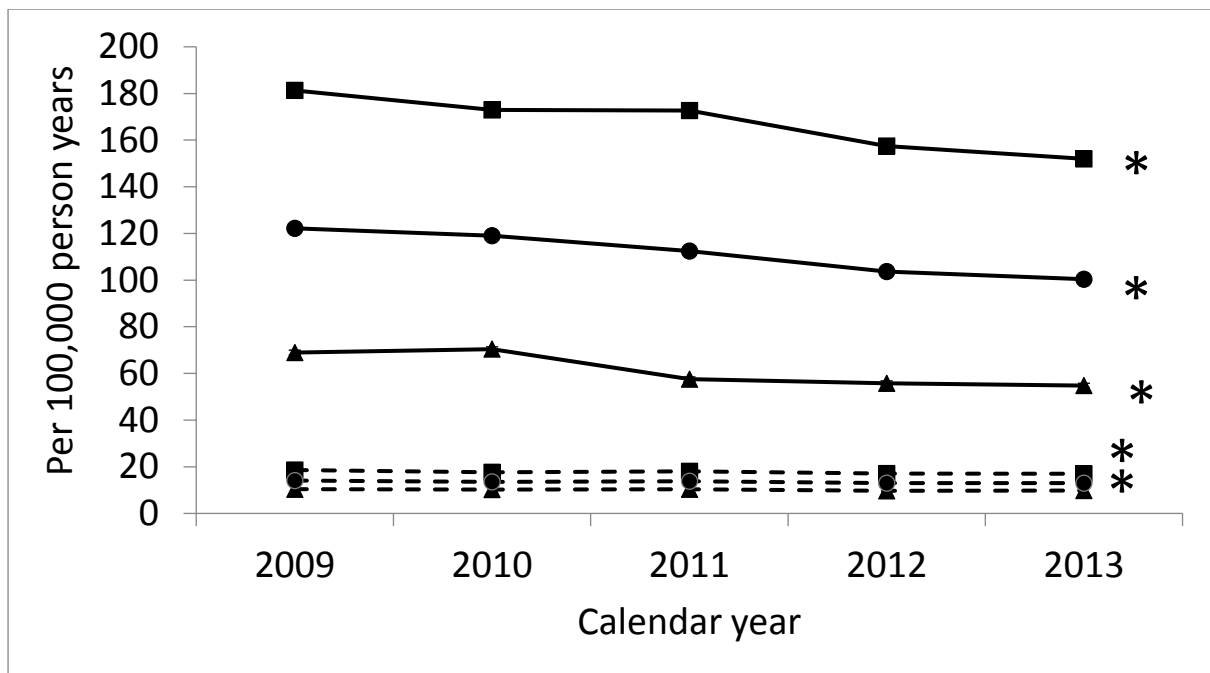

**ESM Fig. 1** Time trend of age–sex standardised any amputation rate. Continuous lines = persons with diabetes; dotted lines = persons without diabetes; square = men; circle = men and women; triangle = women; \* significant time trend (p value of Poisson model <0.05).
